# Supplementary material for: Surface Passivation Using N-Type Organic Semiconductor by One-Step Method in Two-Dimensional Perovskite Solar Cells
Source: MDPI journal article supplement (doi:10.3390/cryst11080933), 2021-08-12
Supplement: s1 [file s1]

Archive with 1 entries (1 files):
- crystals-1307648-supplementary.pdf
