# Supplementary material for: Surface Passivation Using N-Type Organic Semiconductor by One-Step Method in Two-Dimensional Perovskite Solar Cells
Source: MDPI journal article supplement (doi:10.3390/cryst11080933), 2021-08-12
Supplement: s1 [file s1 › crystals-1307648-supplementary.pdf]

Supporting Information

# Surface Passivation Using N-Type Organic Semiconductor by One-Step Method in Two-Dimensional Perovskite Solar Cells

Helong Wang <sup>1,2</sup>, Guanchen Liu <sup>3</sup>, Chongyang Xu <sup>4</sup>, Fanming Zeng <sup>1,\*</sup>, Xiaoyin Xie <sup>3,5,\*</sup> and Sheng Wu <sup>4,\*</sup>

<sup>1</sup> School of Materials Science and Engineering, Changchun University of Science and Technology, Changchun 130022, China; whljls@126.com

<sup>2</sup> School of Mechanical Engineering, Jilin Railway Technology College, Jilin 132200, China

<sup>3</sup> School of Chemistry and Chemical Technology, Hubei Polytechnic University, Huangshi 435003, China; liuguanchen1123@163.com

<sup>4</sup> Yantai Research Institute and Graduate School of HEU, Harbin Engineering University, Harbin 150001, China; xcy666@163.com

<sup>5</sup> Department of Physics, Gachon University, Gyeonggi 13120, Korea

\* Correspondence: zengfm@126.com (F.Z.); xyxie@hbpu.edu.cn (X.X.); wusheng@hrbeu.edu.cn (S.W.)

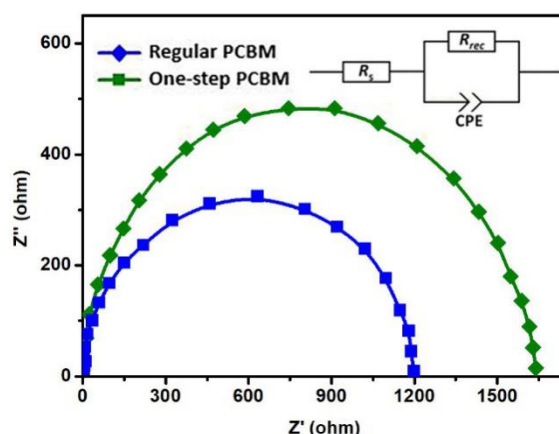

**Figure S1.** Nyquist plots of ETL fabricated in different approaches in 2D PSCs.
